RESEARCH ARTICLE

# Effect of Inulin on Proteome Changes Induced by Pathogenic Lipopolysaccharide in Human Colon

Michele Pier Luca Guarino<sup>1</sup>, Annamaria Altomare<sup>1\*</sup>, Simone Barera<sup>2</sup>, Vittoria Locato<sup>3</sup>, Silvia Cocca<sup>1</sup>, Cinzia Franchin<sup>4,5</sup>, Giorgio Arrigoni<sup>4,5</sup>, Candida Vannini<sup>2</sup>, Sarah Grossi<sup>2</sup>, Paola Campomenosi<sup>2</sup>, Valentina Pasqualetti<sup>3</sup>, Marcella Bracale<sup>2</sup>, Rossana Alloni<sup>6</sup>, Laura De Gara<sup>3</sup>, Michele Cicala<sup>1</sup>

**1** Gastroenterology Unit, University Campus Bio-Medico di Roma, Rome, Italy, **2** Department of Biotechnology and Life Science, University of Insubria, Varese, Italy, **3** Food Sciences and Human Nutrition Unit, University Campus Bio-Medico di Roma, Rome, Italy, **4** Department of Biomedical Sciences, University of Padova, Padova, Italy, **5** Proteomics Center, University of Padova and Azienda Ospedaliera di Padova, Padova, Italy, **6** Surgery Unit, University Campus Bio-Medico di Roma, Rome, Italy

\* [a.altomare@unicampus.it](mailto:a.altomare@unicampus.it)

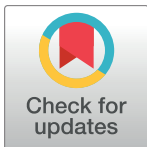

**OPEN ACCESS**

**Citation:** Guarino MPL, Altomare A, Barera S, Locato V, Cocca S, Franchin C, et al. (2017) Effect of Inulin on Proteome Changes Induced by Pathogenic Lipopolysaccharide in Human Colon. *PLoS ONE* 12(1): e0169481. doi:10.1371/journal.pone.0169481

**Editor:** François Blachier, National Institute for Agronomic Research, FRANCE

**Received:** August 23, 2016

**Accepted:** December 16, 2016

**Published:** January 9, 2017

**Copyright:** © 2017 Guarino et al. This is an open access article distributed under the terms of the [Creative Commons Attribution License](https://creativecommons.org/licenses/by/4.0/), which permits unrestricted use, distribution, and reproduction in any medium, provided the original author and source are credited.

**Data Availability Statement:** All relevant data are within the paper and its Supporting Information file.

**Funding:** The University Campus Bio-Medico of Rome provided internal funding.

**Competing Interests:** Sensus (Sensus, Roosendaal, The Netherlands) provided inulin Frutafit IQ®, inulin Frutafit TEX®, agavins from blue agave and levans form *Bacillus subtilis* for this study. This does not alter our adherence to PLOS ONE policies on sharing data and materials.

## Abstract

In the present study, the protective role of inulin against lipopolysaccharide (LPS)-induced oxidative stress was evaluated on human colonic mucosa using a proteomic approach. Human colonic mucosa and submucosa were sealed between two chambers, with the luminal side facing upwards and overlaid with Krebs (control), LPS or LPS+ inulin IQ solution. The solutions on the submucosal side (undernatants) were collected following 30 min of mucosal exposure. iTRAQ based analysis was used to analyze the total soluble proteomes from human colonic mucosa and submucosa treated with different undernatants. Human colonic muscle strips were exposed to the undernatants to evaluate the response to acetylcholine. Inulin exposure was able to counteract, in human colonic mucosa, the LPS-dependent alteration of some proteins involved in the intestinal contraction (myosin light chain kinase (MLCK), myosin regulatory subunit (MYL)), to reduce the up-regulation of two proteins involved in the radical-mediated oxidative stress (the DNA-apurinic or apyrimidinic site) lyase APEX1 and the T-complex protein 1 subunit eta (CCT7) and to entail a higher level of some detoxification enzymes (the metallothionein-2 MT2A, the glutathione-S-transferase K GSTk, and two UDP-glucuronosyltransferases UGT2B4, UGT2B17). Inulin exposure was also able to prevent the LPS-dependent intestinal muscle strips contraction impairment and the mucosa glutathione level alterations. Exposure of colonic mucosa to inulin seems to prevent LPS-induced alteration in expression of some key proteins, which promote intestinal motility and inflammation, reducing the radical-mediated oxidative stress.

**Abbreviations:** LPS, lipopolysaccharide; Ach, acetylcholine; SMSs, smooth muscle strips; MLCK, myosin light chain kinase; MYL9, myosin regulatory subunit 9; APEX1, the DNA-(apurinic or apyrimidinic site) lyase; MT2A, the metallothionein-2; GSTk, the glutathione-S-transferase K; UGT, UDP-glucuronosyltransferases; ROS, reactive oxygen species.

## Introduction

Fructans, such as inulin, are dietary fibers, which stimulate gastro-intestinal function by acting as prebiotics. They are characterized by resistance to digestion, fermentability and selectivity in promoting the growth or activity of beneficial bacteria [1]. Resistance to small-intestinal digestion is due to the lack of enzymes that hydrolyze the polymer bonds in humans. This allows the prebiotic to reach the colon intact and undergo fermentation by a limited number of bacteria genera/species. Interestingly, we have recently demonstrated that inulin preserves its antioxidant capability following cooking and simulated digestion processes [2].

The interaction between dietary intake and the microbiota in healthy people has been recognized for many years. However, evidence of the interaction between prebiotics, gastro-intestinal (GI) microbiota and digestive disorders is now emerging, in part due to the development of more robust approaches to examine dietary intake, complex microbial ecosystems and disease outcomes [3]. In animal models, prebiotics have been reported to provide beneficial effects either by increasing fecal IgA levels [4] or by directly modulating host cell gene responses [5], and it has been demonstrated that prebiotics can modulate both adaptive and innate immune systems both in animals and in humans [6,7]. Inulin represents the most commonly used prebiotic and it has been demonstrated that, in co-administration with probiotics, it promotes probiotic-induced anti-inflammatory effects [8,9]. It was shown that combination of inulin with *Lactobacillus plantarum* LS/07 CCM7766 abolishes 1,2-dimethylhydrazine (DMH)-induced inflammatory process in the jejunal mucosa by inhibiting the production of pro-inflammatory cytokines and inducible nitric oxide synthase (iNOS) and by stimulation of anti-inflammatory cytokine synthesis [10].

We have recently demonstrated the protective effect of inulin on lipopolysaccharide (LPS)-induced damage of colonic smooth muscle in an *ex vivo* experimental model, which seems to be related to the presence of oxidative stress [2]. LPS is known to be a potential mediator of multi-system organ failure; it has been shown that endotoxemia results in a significant impairment of intestinal smooth muscle contractility in animal models [11] can alter the kinetic properties of human colonic muscle cell (SMCs) [12,13]. These effects seem to be related to activation of muscular macrophages by mucosal translocation of LPS, which can bind to specific receptor on SMCs, or by mucosal oxidative stress; activated muscular macrophages then secrete several mediators including prostaglandins, H<sub>2</sub>O<sub>2</sub>, cytokines and nitric oxide [12–15].

For this reason, LPS represents a good model for studying functional GI disorders. The beneficial effect of inulin on LPS-induced muscle cell impairment, that we observed in our previous work, could therefore be related to the ability to counteract the oxidative damage induced by LPS in the colonic mucosa since the level of protein oxidation induced by LPS exposure was remarkably reduced when the tissue was treated with inulin [2]. However, little is known about the specific mechanisms by which inulin acts on intestinal muscle function and the molecular mechanisms involved in the direct and/or indirect response of colonic mucosa to this prebiotic. In the present study, the protective role of inulin against oxidative stress induced by LPS in colonic mucosa was evaluated using the Isobaric Tags for Relative and Absolute Quantification (iTRAQ) proteomic approach. iTRAQ is one of the most reliable methods to relatively and absolutely quantify proteins. This mass spectrometry-based technique enables the unbiased evaluation of protein expression in complex biological samples and has wide application in the biological and biomedical sciences [16]. Furthermore, since inulin does not cross the plasma membrane of colonic epithelial cells, we expected that the protective role against cellular protein oxidation could be mediated by a direct inulin effect on cellular redox state. Finally, we evaluated the effect of the prebiotic on colonic muscle strips, which, compared to isolated muscle cells, better represent the functional activity of the intestine.

## Materials and Methods

The experimental protocols were approved by the Ethics Committee of Campus Bio-Medico University of Rome (Prot 20.09 ComEt CBM). Written informed consent was obtained from all patients prior to surgery.

### Chemicals

For the experiments reported in this study inulin Fructafit IQ Instant Quality, (Sensus, Roosendaal, The Netherlands) from chicory roots was used. This inulin consists of linear polymers with degree of polymerization of 8–13. For the purpose of this study it was highly purified (90–99.5%) with a residual contamination of fructose, sucrose or glucose. All the other chemicals were purchased from Sigma-Aldrich, Milan, Italy.

For the proteomic analysis, the iTRAQ 4-plex reagents were purchased from AB Sciex (Framingham, MA, USA) and all other reagents were of MS grade.

### Tissue Specimens

Normal colonic mucosa was obtained from the healthy margins of cancer resections from six patients with adenocarcinoma of the colon (M:F = 4:2, age range 48–73 years), treated at the Campus Bio-Medico University of Rome (Italy) between September 2014 and November 2015. None of these patients had a history of colonic motility or a neuromuscular or collagen disorder; specimens with *diverticula* were excluded. Left hemi-colectomy was performed in all patients, affected by carcinoma of the sigma and a specimen from the transverse colon margin was obtained, to be sure that tissue used for the experimental set up was at a distance from the area involved by the carcinoma. Fresh specimens were brought to the laboratory in chilled Krebs solution (containing (in mM) 116.6 mM NaCl, 21.9 mM NaHCO<sub>3</sub>, 1.2 mM KH<sub>2</sub>PO<sub>4</sub>, 5.4 mM glucose, 1.2 mM MgCl<sub>2</sub>, 3.4 mM KCl, and 2.5 mM CaCl<sub>2</sub>), gassed with carbogen (95% O<sub>2</sub> and 5% CO<sub>2</sub>).

### Experimental Set-Up

After removal of the muscle layer and serosa, the tissue containing mucosa and submucosa was sealed between two tubes with the luminal side of the mucosa facing upwards and submucosal side facing downwards, as previously described [13]. Inflammation conditions were induced by LPS from *Escherichia coli* pathogenic strain serotype O111:B4 (Sigma-Aldrich, Milan, Italy) exposure.

In the experimental model, the luminal side of the mucosa was overlaid with 5 mL of Krebs (N-supernatant), 5 mL of 100 µg/mL LPS solution (500,000 endotoxin units/mg) in Krebs (LPS-supernatant), or with 5 mL of LPS + 100 mg/mL inulin IQ solution in Krebs (LPS+INU-supernatant). LPS concentration was chosen based on previous evidence [2]. The whole biological system was maintained for 30 minutes at 37°C in a thermostatic bath, which was constantly oxygenated. Smaller and larger tubes were adopted to guarantee that the set-up was well sealed; the efficacy of this operation was ensured by monitoring the level of the solution in the smaller tube [2].

After 30 minutes, the Krebs solutions on the submucosal side, in the absence (N-undernatant) or presence of LPS (LPS-undernatant) and LPS-inulin (LPS+INU-undernatant), were collected to evaluate their effects on smooth muscle strips (SMSs) contractility (see below). As previously demonstrated by histopathological evaluation [13], in this experimental set up the dissected mucosa and submucosa do not show necrotic signs or significant inflammatory infiltrates in the lamina propria or in the submucosal layer before and after 30 minutes exposure to

undernatants. Finally, human colonic mucosa was stored at  $-80^{\circ}\text{C}$  in order to perform proteomic analysis.

### Total Protein Extraction

50 mg of each sample (six patients, three conditions per patient: N-, LPS-, LPS+INU- treated mucosa samples) were disrupted in liquid nitrogen and suspended in 1 mL of 6 M Urea, 2 mM Thiourea, 40 mM Tris pH, 0.1% w/v CHAPS, 0.1% w/v DTT, supplemented with protease inhibitors (0.5 mM phenylmethylsulfonyl fluoride, 1mM benzamidine, and 1  $\mu\text{M}$  leupeptin). The homogenate was incubated for 2 h and then centrifuged at 10,000g for 30 min at  $4^{\circ}\text{C}$ . The supernatant was collected, diluted 1:5 in 80% acetone and kept at  $-20^{\circ}\text{C}$  overnight. The samples were centrifuged at 12,000g for 20 min at  $4^{\circ}\text{C}$ . The resultant pellets were re-suspended in 0.5 M triethylammonium bicarbonate solution with 0.1% SDS and quantified. The protein concentration was determined according to the Bradford method, with eight replicates for each sample. Three independent protein extractions were performed for each condition tested.

### Sample Preparation for iTRAQ Analysis

For each treatment, equal amounts (20 $\mu\text{g}$ ) of proteins extracted from six patients were pooled. The pools derived from N-, LPS- and LPS+INU- treated mucosal samples were named Control, LPS and LPS+INU respectively.

60  $\mu\text{g}$  of each pool were reduced with 10 mM dithiothreitol (DTT) for 1 h at  $56^{\circ}\text{C}$ , alkylated with 55 mM iodoacetamide for 45 min in the dark, and digested using sequencing grade modified trypsin (Promega) at a ratio of 1:35 (w:w) for 18 h at  $37^{\circ}\text{C}$ . Peptides were labelled using an iTRAQ 4-plex kit (AB Sciex Inc., Framingham, MA, USA) according to the manufacturer's protocol. The quantitative analysis was carried out on two completely independent replicates and pools were labelled with iTRAQ tags according to the following scheme: for the first replicate 114 for Control, 116 for LPS, and 117 for LPS+INU; for the second replicate, 114 for LPS+INU, 115 for LPS, and 117 for Control.

Before pooling, 1  $\mu\text{g}$  of each labeled sample was independently analyzed by MS to verify the completeness of the labeling. Strong cation exchange chromatography was performed as previously described [17] and samples were fractionated in a step-wise manner using the following concentrations of KCl (in 5 mM  $\text{KH}_2\text{PO}_4$  and 25% acetonitrile, pH 2.9): 50, 100, 150, 200 and 350 mM. Samples were then desalted using  $\text{C}_{18}$  cartridges (Sep-Pak C18; Waters, Milford, MA, USA) following manufacturer's instructions and finally dried under vacuum and stored at  $-20^{\circ}\text{C}$  till LC-MS/MS analyses were performed.

### LC-MS/MS Analysis

All LC-MS/MS analyses were conducted with a LTQ-Orbitrap XL mass spectrometer (ThermoFisher Scientific, Waltham, MA, USA) coupled online with a nano-HPLC Ultimate 3000 (Dionex-ThermoFisher Scientific, Waltham, MA, USA) using a 10 cm picofrit column (I.D. 75  $\mu\text{m}$ , New Objectives, Woburn, MA, USA) packed in house with  $\text{C}_{18}$  material (Aeris Peptide 3.6 mm XB-C18, Phenomenex). Chromatographic and instrumental conditions were as previously reported [18]. To increase protein identification and robustness of quantification, all peptides identified in each sample (as described in the next section) were used to generate a static exclusion list that was then used to perform (under the same chromatographic and instrumental conditions) a second LC-MS/MS run for each sample fraction.

## Data Analysis

Raw files were analyzed with a MudPIT protocol using Proteome Discoverer 1.4 (Thermo-Fisher Scientific, Waltham, MA, USA) connected to a Mascot server (version 2.2.4, Matrix Science, London, UK). MS/MS spectra were matched against the human section of the Uniprot database (version 20150107, 89706 entries), setting trypsin as digesting enzyme with up to one missed cleavage. Peptide and fragment tolerance were set to 20 ppm and 0.6 Da, respectively. Methylthiocysteine, 4-plex iTRAQ at the N-terminus and Lys were set as fixed modifications, while methionine oxidation was set as variable modification. A search against a randomized database and the algorithm Percolator were used to assess the false discovery rate (FDR). Data were filtered to keep only proteins identified with high confidence ( $q \leq 0.01$ ) and quantified with at least 2 unique peptides. iTRAQ ratios were normalized on the protein median value and data from both replicates were merged to obtain a single list of quantified proteins.

## Glutathione Analysis

Samples of colonic mucosa (0.2–0.4 g) were freshly put into 0.5% metaphosphoric acid in 1:2 ratio (w:v), minced with a surgical scissor at 4°C, frozen in liquid nitrogen and stored at -80°C for glutathione determination. Glutathione pool and redox state were measured as previously described [19].

## Ex Vivo Experiments on Human Colonic Smooth Muscle Strips

**Isolation of smooth muscle strips.** After removal of the mucosa and submucosa layers, colonic smooth muscle was cut into small strips (10-mm long by 2-mm wide,  $0.10 \pm 0.05$  g weight) by sharp dissection, identifying the circular orientation, according to the position of the taenia coli. The smooth muscle strips (SMSs) were mounted in separate 10-mL chambers as previously described [20]. Strips were initially stretched to 15 g of load, to bring them near conditions of optimum force development, and equilibrated for an additional 30 minutes after continuous perfusion with carbogenated Krebs solution. The solution was equilibrated with carbogen at pH 7.4 and at  $37 \pm 0.5^\circ\text{C}$ .

**Assessment of contractile activity of SMSs.** During the perfusion period, spontaneous phasic contractions of SMSs developed gradually and stabilized after 30 minutes of equilibration. After stabilization, strips were stimulated with a maximally effective dose of acetylcholine ( $10^{-5}$  M Ach) in order to test the physiologic cholinergic response. After 10 minutes of washout, the experimental protocol was performed. The human colonic SMSs were exposed to N-undertant or to LPS-undertant or to LPS+INU-undertant for 30 minutes and afterwards stimulated with a maximally effective dose of acetylcholine ( $10^{-5}$  M Ach). Isometric contractions were measured using force displacement transducers connected with a computer using MacLab system (Oxford, UK). In muscle strips experiments, the amplitude of the contractions was measured in grams. Ach-induced response was assessed calculating the percentage of maximal response compared to basal tone. Following supernatants exposure, Ach-induced contraction was compared to that obtained in basal condition.

## RNA Extraction and qPCR Analysis

Intestinal samples, taken from five individuals and exposed either to Krebs solution (control), LPS or LPS+INU were used for total RNA extraction. Samples were kept frozen and, after adding 1 mL of TRI Reagent (Sigma Aldrich, Milan, Italy) per every 100 mg of tissue, they were homogenized using T10 basic Ultra-Turrax (IKA, Staufen, Germany), working on ice. Subsequent steps were performed according to the manufacturer's instructions. For real-time quantitative PCR

(qPCR), cDNA was generated from 2 µg of RNA by using the iScript cDNA synthesis kit (Biorad, Milan, Italy). Gene expression analyses were performed in triplicate, either on single patients' RNA or on a pool of their RNAs, using a CFX96 thermal cycler (Biorad, Milan, Italy) and the iTAQ Universal Sybr Green Supermix (Biorad, Milan, Italy). Relative mRNA quantification was obtained using the  $2^{-\Delta\Delta C_t}$  method, using the geometric average of the  $C_q$ s of three reference genes, namely beta-2-Microglobulin, GAPDH and HPRT for normalization purposes. Melting curve analysis was performed to ensure that single amplicons were obtained for each target. Primers for the genes under investigation were designed to have at least one of the primers in the pair designed on an exon-exon junction, or to encompass at least one intron, except for UGT2B4. For primer design and thermodynamic analysis of their quality the following programs were used: the Primer-Blast tool at NCBI (<http://www.ncbi.nlm.nih.gov/tools/primer-blast/>), OligoCalc (<http://biotools.nubic.northwestern.edu/OligoCalc.html>) and the IDT SciTools (<http://eu.idtdna.com/pages/scitools>). Primer sequences are reported in S1 Table.

## Statistical Analysis

Statistical analysis were performed on all experimental results by GraphPad Prism statistical software program 4.02 version by using different statistical analyses as indicated in the figures and tables. Data concerning glutathione measurements were subjected to one-way analysis of variance (ANOVA). For gene expression analyses, ANOVA was performed on the data obtained from the five individuals, considered as "biological replicates". Differences were considered to be statistically significant with  $P < 0.05$ . Student's *t* test was used for statistical analysis of smooth muscle strips experiments. A  $P$  value  $< 0.05$  was considered significant. For proteomic analysis, a two-tailed *z*-test was performed and only proteins that showed a iTRAQ ratios above 1.3 or below 0.7 and with  $p$  value  $\leq 0.05$  were considered as significantly altered.

## Results

### Proteomic Analysis

iTRAQ analysis led to the identification of 865 proteins within the human genome. iTRAQ ratios above at least 1.3 (1.3-fold induction and higher) were assumed to indicate up-regulation. The opposite scenario (values below 0.7) denoted down-regulation. A two-tailed *z*-test was used to select only proteins that showed a statistically significant ( $p < 0.05$ ) altered abundance. By employing this filter, we identified 24 differentially regulated proteins in LPS and LPS+INU samples compared to the control: among them 9 were differentially expressed only in LPS treated cells indicating that inulin exposure was able to restore the LPS-dependent alteration. Eight proteins were significantly altered only in LPS+INU treated cells (Table 1). We classified the differentially expressed proteins using PANTHER (protein analysis through evolutionary relationships) classification system to obtain an understanding of the molecular and functional characteristics.

In total, 7 biological processes and 5 protein classes were classified. The most important biological categories were cellular, metabolic, development processes and response to stimulus. The most important protein categories were cytoskeletal protein, calcium binding protein and transferase (Fig 1).

Inulin exposure was able to restore, in human colonic mucosa, the LPS-dependent alteration of some proteins involved in the host response and in the intestinal smooth muscle contraction such as the myosin light chain kinase (MLCK) and the myosin regulatory subunit 9 (MYL9) and to reduce the upregulation of two proteins involved in the radical-mediated oxidative stress induced by LPS (the DNA-apurinic or apyrimidinic site lyase) APEX1 and the T-complex protein 1 subunit eta CCT7). Moreover, the administration of inulin entailed a higher

**Table 1. List of the proteins that showed significantly ( $p < 0.05$ ) altered abundance in LPS and LPS+INU samples in comparison with the control.**

| Uniprot accession number | Protein description                                                                                                      | LPS/CTR | LPS+INU/CTR |
|--------------------------|--------------------------------------------------------------------------------------------------------------------------|---------|-------------|
| P62158                   | Calmodulin OS = Homo sapiens GN = CALM1 PE = 1 SV = 2 - [CALM_HUMAN]                                                     | 1,8     | 1,0         |
| Q5T7C4                   | High mobility group protein B1 OS = Homo sapiens GN = HMGB1 PE = 1 SV = 1 - [Q5T7C4_HUMAN]                               | 0,6     | 1,0         |
| Q15746-9                 | Isoform 7 of Myosin light chain kinase, smooth muscle OS = Homo sapiens GN = MYLK— [MYLK_HUMAN]*                         | 0,6     | 1,0         |
| P24844                   | Myosin regulatory light polypeptide 9 OS = Homo sapiens GN = MYL9 PE = 1 SV = 4 - [MYL9_HUMAN]                           | 0,6     | 1,0         |
| Q9Y2Q3                   | Glutathione S-transferase kappa 1 OS = Homo sapiens GN = GSTK1 PE = 1 SV = 3 - [GSTK1_HUMAN]                             | 0,6     | 1,0         |
| I3L397                   | Eukaryotic translation initiation factor 5A-1 (Fragment) OS = Homo sapiens GN = EIF5A PE = 1 SV = 3 - [I3L397_HUMAN]     | 0,5     | 1,0         |
| E9PE82                   | Short-chain-specific acyl-CoA dehydrogenase, mitochondrial OS = Homo sapiens GN = ACADS PE = 1 SV = 1 - [E9PE82_HUMAN]   | 0,5     | 1,0         |
| Q6P996-3                 | Isoform 3 of Pyridoxal-dependent decarboxylase domain-containing protein 1 OS = Homo sapiens GN = PDXDC1 - [PDXD1_HUMAN] | 1,5     | 1,0         |
| P27695                   | DNA-(apurinic or apyrimidinic site) lyase OS = Homo sapiens GN = APEX1 PE = 1 SV = 2 - [APEX1_HUMAN]                     | 1,3     | 1,0         |
| Q6ZN40                   | Tropomyosin 1 (Alpha), isoform CRA_f OS = Homo sapiens GN = TPM1 PE = 1 SV = 1 - [Q6ZN40_HUMAN]                          | 0,6     | 0,6         |
| P07951-2                 | Isoform 2 of Tropomyosin beta chain OS = Homo sapiens GN = TPM2 - [TPM2_HUMAN]                                           | 0,6     | 0,7         |
| P21291                   | Cysteine and glycine-rich protein 1 OS = Homo sapiens GN = CSRP1 PE = 1 SV = 3 - [CSRP1_HUMAN]                           | 0,6     | 0,6         |
| P51911                   | Calponin-1 OS = Homo sapiens GN = CNN1 PE = 1 SV = 2 - [CNN1_HUMAN]                                                      | 0,5     | 0,6         |
| Q9NR12-2                 | Isoform 2 of PDZ and LIM domain protein 7 OS = Homo sapiens GN = PDLIM7 - [PDLI7_HUMAN]                                  | 0,5     | 0,7         |
| P17661                   | Desmin OS = Homo sapiens GN = DES PE = 1 SV = 3 - [DESM_HUMAN]                                                           | 0,7     | 0,6         |
| Q99832-4                 | Isoform 4 of T-complex protein 1 subunit eta OS = Homo sapiens GN = CCT7 - [TCPH_HUMAN]                                  | 1,3     | 0,8         |
| P09669                   | Cytochrome c oxidase subunit 6C OS = Homo sapiens GN = COX6C PE = 1 SV = 2 - [COX6C_HUMAN]                               | 1,0     | 1,3         |
| P02795                   | Metallothionein-2 OS = Homo sapiens GN = MT2A PE = 1 SV = 1 - [MT2_HUMAN]                                                | 1,0     | 1,3         |
| P49748-2                 | Isoform 2 of Very long-chain specific acyl-CoA dehydrogenase, mitochondrial OS = Homo sapiens GN = ACADVL—[ACADV_HUMAN]  | 1,0     | 1,3         |
| O75795                   | UDP-glucuronosyltransferase 2B17 OS = Homo sapiens GN = UGT2B17 PE = 2 SV = 1 - [UDB17_HUMAN]                            | 1,0     | 1,7         |
| P06133                   | UDP-glucuronosyltransferase 2B4 OS = Homo sapiens GN = UGT2B4 PE = 1 SV = 2 - [UD2B4_HUMAN]                              | 1,0     | 1,5         |
| Q01995                   | Transgelin OS = Homo sapiens GN = TAGLN PE = 1 SV = 4 - [TAGL_HUMAN]                                                     | 1,0     | 0,7         |
| A0A087WZF1               | Lipoma-preferred partner OS = Homo sapiens GN = LPP PE = 1 SV = 1 - [A0A087WZF1_HUMAN]                                   | 1,0     | 0,7         |
| H0YL34                   | Synemin OS = Homo sapiens GN = SYNM PE = 1 SV = 1 - [H0YL34_HUMAN]                                                       | 1,0     | 0,6         |

\* MYLK is indicated with the alias MLCK in the text.

doi:10.1371/journal.pone.0169481.t001

level of some detoxification enzymes (the metallothionein-2 MT2A, the glutathione-S-transferase K GSTk, and two UDP- glucuronosyltransferases UGT2B4, UGT2B17) compared to the LPS treatment.

To investigate the mechanisms underlying the changes in protein levels, the levels of transcript corresponding to some of the differentially accumulated proteins were analyzed by qPCR. No differences in transcript levels were observed for most of the genes analysed, including GSTK1, APEX1 and MT2A (Fig 2). However, MLCK and MYL9 transcript levels were strongly increased after LPS treatment, whereas they remained unchanged in the LPS+INU condition (Fig 2).

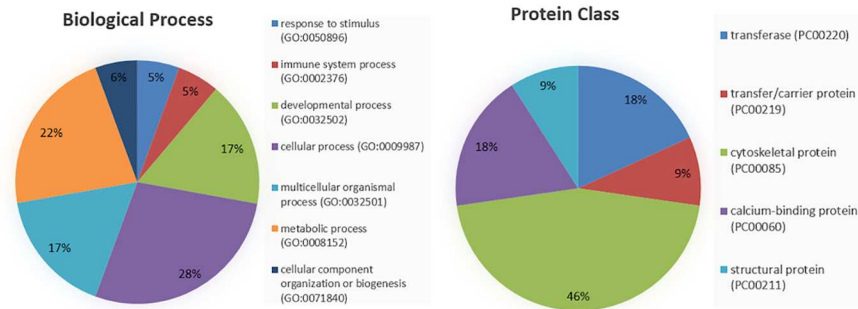

**Fig 1. Functional distribution of the differentially regulated proteins in LPS and LPS+INU samples compared to the control, according to biological process and protein class.**

doi:10.1371/journal.pone.0169481.g001

### Human Smooth Muscle Strips Analysis

Colonic muscle strips, after one-hour of stabilization, developed basal tone and spontaneous activity, consisting of small amplitude rhythmic contractions of myogenic origin resented and a maximal contraction to Ach of  $68.6 \pm 8.5\%$  above the baseline; after 10 min of washout, basal tone was restored. Following 30-min exposure to the LPS-undernatant, a significant decrease in maximal Ach-induced contraction was observed when compared to the contraction induced in CTR muscle strips incubated with the N-undernatant ( $49 \pm 5\%$  vs  $10 \pm 1\%$  respectively,  $P < 0.05$ ) and this was completely prevented by the pre-incubation of the LPS with inulin ( $12 \pm 2\%$ ,  $P = ns$  versus N-undernatant) (Fig 3).

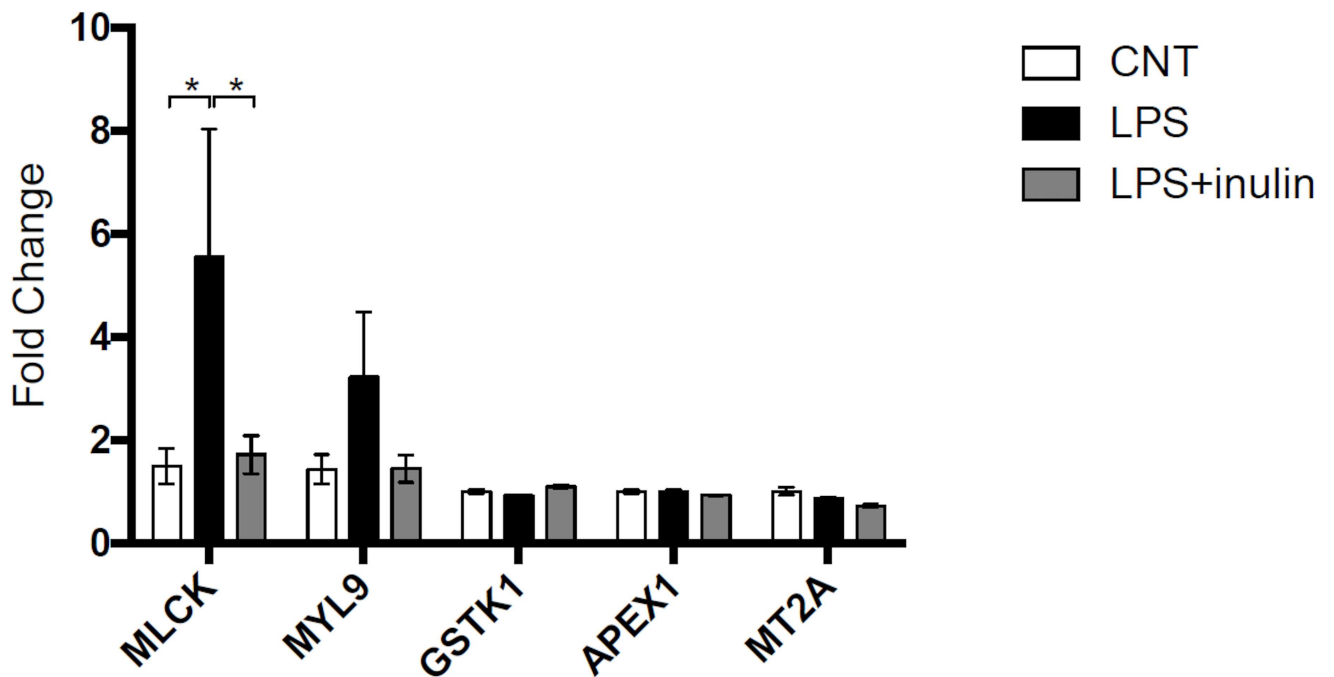

**Fig 2. Changes in the levels of specific transcripts in response to LPS or LPS+INU treatments, compared to control condition.** Values are means  $\pm$  SE. The results were analyzed by ANOVA test. \* indicates significant values ( $p < 0.05$ ).

doi:10.1371/journal.pone.0169481.g002



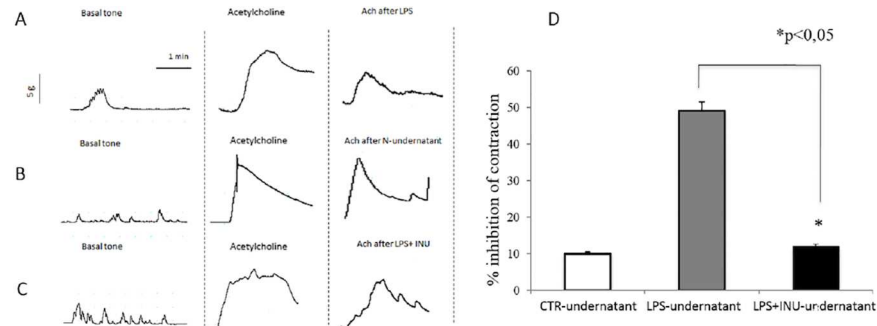

**Fig 3.** Selected representative traces showing colonic strip muscle activity after exposure to the LPS-undernatant, (A), to the N-undernatant (B,  $p < 0.05$ .) and after pre-incubation of LPS with inulin (C,  $p = ns$  versus N-undernatant). Percentage of inhibition of contraction after undernatants administration (D). Values are means  $\pm$  SEM of each group. The results were analyzed by Student's t-test. \* $p < 0.05$ .

doi:10.1371/journal.pone.0169481.g003

## Glutathione Pool

GSH level increased in colonic mucosa after LPS treatment compared to the control. Whereas the presence of inulin during LPS treatment maintained GSH content of colonic mucosa at basal levels (Fig 4A). The levels of oxidized glutathione (GSSG) were very low and the glutathione redox state, calculated as reduced glutathione/reduced + oxidized glutathione ratio, did not change in colonic mucosa after LPS and LPS+inulin exposure compared to the control (Fig 4B). Our data suggest that glutathione might be involved in the colonocytes' response to LPS exposure, a response blocked by the presence of inulin. Indeed the LPS-induced increase in GSH is blocked in the presence of inulin.

## Discussion

Data from the present study confirm the protective effect of inulin on the LPS induced colonic mucosal oxidative stress and muscle impairment. Using a iTRAQ analysis, we found that inulin was able to restore the level of some important protective proteins, involved in the inflammatory processes and was able to prevent impairment of smooth muscle contraction throughout the ability to revert the LPS-dependent alteration of some proteins involved in the intestinal smooth muscle contraction. We cannot exclude that the protective effects of inulin against LPS are mediated by a barrier effect that the fructose polymers might have interacting with LPS. However, proteomic analysis revealed that LPS+inulin treatment caused specific changes in the abundance of some proteins, different from those caused by LPS (Table 1). This evidence reinforces the hypothesis of a specific effect of inulin on colonic mucosa, the mechanism of which requires further investigation. Inulin-type fructans have been reported to stimulate saccharolysis in the colonic lumen and to favor the growth of lactobacilli and/or bifidobacteria [21]. The use of specific probiotics and prebiotics seems to be associated with reduced mucosal inflammation in experimental models of inflammatory bowel disease [22], but limited knowledge exists regarding the mechanism of action.

We have recently shown that inulin has an antioxidant activity that is not affected by treatments such as high temperature, pH changes and exposure to digestive enzymes [2], thus supporting the hypothesis that this fructan, besides modulating intestinal microbiota, can directly act on intestinal mucosa. Interestingly colonic mucosa exposure to inulin has been shown to prevent the LPS-induced impairment of the muscle contractility, possibly counteracting the mucosal production of free radicals as the amount of mucosal proteic carbonyl groups was reduced by about 60% compared to LPS exposed mucosa [2].

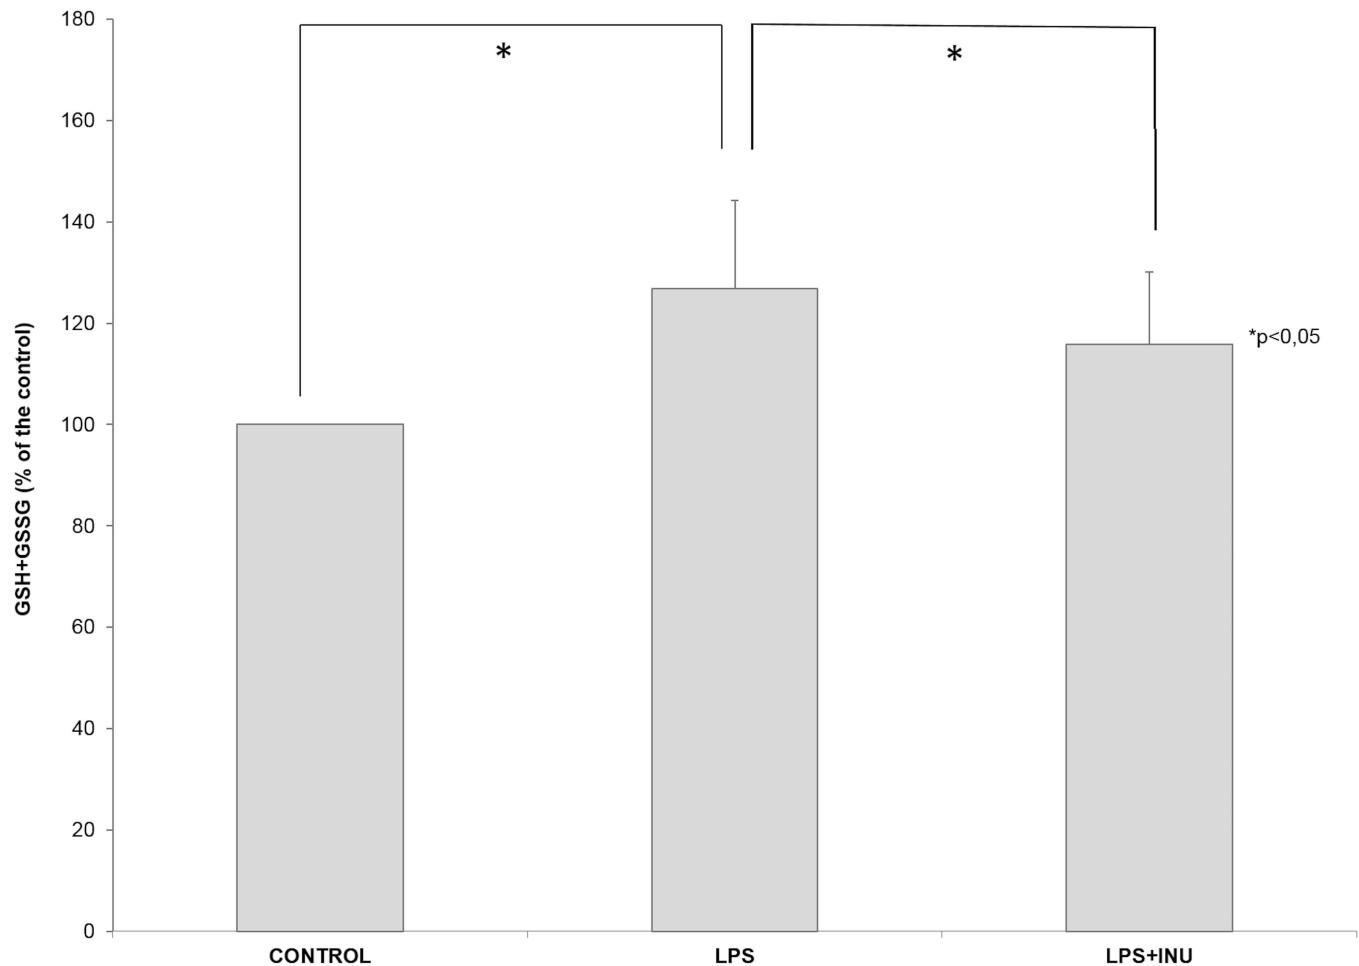

**Fig 4. (A)** The level of reduced glutathione (GSH) and (B) glutathione redox state (GSH/GSH+GSSG) in mucosa layer submitted to different experimental conditions (Control, LPS and LPS+Inulin treatments). The results were analyzed by ANOVA test. \* $p < 0.05$ .

doi:10.1371/journal.pone.0169481.g004

The existing literature on *in vivo* effect of inulin ingestion is limited. In clinical studies on human healthy volunteers administration of oligofructose and inulin promotes the growth of specific bacteria, especially Bifidobacteria and Lactobacillus, which have defined metabolic functions with health benefits, such as production of acetic and lactic acids and synthesis of B vitamins [1, 23–25]

Interestingly, in clinical studies on Inflammatory bowel disease (IBD) patients, prebiotics added to conventional therapy are able to obtain a clinical remission/response in 60% of patients [26]. Moreover in a small randomized controlled trial inulin was superior to placebo in decreasing endoscopic and microscopic inflammation in patients affected by pouchitis [27] even if the underlined mechanism is unknown. An interesting systematic review has shown that in adult patients with overweight or obesity administration of Inulin-type fructans is able to reduced serum levels of several inflammatory mediators, such as interleukin-6 and tumor necrosis factor, suggesting an anti-inflammatory action of this fiber [28].

In the present investigation, the effects of inulin on protection from inflammation was explored using a iTRAQ analysis. Interestingly, inulin was able to restore the level of some important proteins involved in protection from the radical-mediated oxidative stress induced by LPS, such as APEX1 and the T-complex protein 1 subunit eta CCT7. APEX1 is a multifunctional protein

which plays a fundamental role in DNA repair and redox signaling by activating proteins involved in cellular response to several stresses such as inflammation and cancer. It has been shown that APEX1 controls the inflammatory response in LPS-stimulated macrophages [29] and it is significantly increased in the colonic epithelium of patients with ulcerative colitis [30]. In the present study, we also observed an increased content of the CCT subunit eta (CCT7) in LPS+INU treated samples compared to the control. CCT orchestrates the folding of many newly synthesized proteins and it is involved in membrane fusion events [31, 32]. Moreover, it seems to be important in the retrograde mitochondria signaling induced when mitochondria antioxidant defenses are overwhelmed. The excessive ROS production can trigger a mitochondrial unfolded protein response (UPRmt) involved in the field of mitochondrial dysfunction. It has been proposed that the UPRmt might thus represent one of the mechanisms that senses bacterial pathogens in the intestinal mucosae [33].

In LPS+inulin treated mucosa we also found the accumulation of the metallothionein MT2A. Metallothioneins, in addition to sequestering heavy metals, are also able to scavenge free radicals and to reduce damage from oxidative stress [34]. Our findings are in agreement with those of Inoue et al. [35] who demonstrated the anti-inflammatory effects of metallothioneins on disturbances of lung, kidney and liver induced by LPS. Moreover, metallothioneins are known to inhibit the NF- $\kappa$ B signaling [36] and to be downregulated in the intestinal mucosa of patients with inflammatory bowel disease and in gastrointestinal tumors [37, 38].

Another relevant finding from the present investigation is that, in LPS-treated mucosa, GSTk protein was down-regulated and inulin treatment was able to restore its level. GSTs are a superfamily of detoxification enzymes that play an important role in the protection of tissues against potentially harmful compounds [39]. In LPS+INU treated colonic mucosa not only the level of GSTk was restored but also two UGT enzymes were accumulated. The UGT gene family codes for 19 unique protein isoforms, which conjugate glucuronic acid to a wide range of both endogenous and xenobiotic substrates. The addition of the glucuronide to the target converts it into less bioactive compound and increases its water solubility promoting the excretion of the conjugate from the body. In this manner UGTs are able to detoxify a variety of well-known food carcinogens [40, 41]. In the intestinal mucosa of coeliac subjects, UGT activity is significantly lower than in the corresponding tissues of healthy people [42] and its expression decreases in colon cancer tissue as compared with normal tissues [43, 44]. Furthermore, variants of the UGT-enzyme family influence the risk to develop cancer after exposure to environmental and dietary carcinogens [44].

Analysis of transcript levels suggested that the observed changes of protein levels in LPS and LPS+INU treated cells were likely due to an altered protein turnover rather than to an altered regulation of mRNA levels.

Supporting our previous finding, demonstrating that inulin is able to restore colonic muscle cell contraction impairment due to LPS exposure [2], in the present investigation we found that the prebiotic restores the contractility of muscle strips in response to agonists. Impairment of contractility in gastrointestinal disorders is mainly due to an inflammatory process that starts in the intestinal mucosa and reaches the deeper muscle layer. In the present investigation we found that the administration of inulin not only entailed a higher level of detoxification enzymes and proteins involved in the radical-mediated oxidative stress, as already stated, but also reverted the LPS-dependent alteration of some proteins involved in the intestinal smooth muscle contraction. In particular, we found that MLCK and MYL9 alteration induced by LPS were counteracted by inulin exposure. MLCK is implicated in smooth muscle contraction via phosphorylation of MYL9 [45] and targeted deletion of MLCK in adult mouse smooth muscle resulted in severe gut dysmotility [46]. Nevertheless, the trend of expression of MLCK and MYL9, revealed by transcriptomic analysis, was contradictory. Whereas MLCK and MYL9

were among the downregulated proteins in LPS treated tissue, their mRNAs were increased, suggesting a possible regulative degradation at the protein level. The reduced net expression of MLCK by proteasome degradation has been reported in different tissues [47,48]. Even if these data are referred to the mucosal level of the enzymes, we cannot exclude that a similar mechanism could be present in the muscle layer (which include several cell types) and account, together with protection of muscle cells from oxidative stress, for the prevention of contractility impairment of the entire muscle strips. The rapid increase in MLCK transcript is in agreement with previous reports, showing that LPS treatment leads to a quick induction of MLCK mRNA in lung endothelial cells [49].

Finally, in our experimental system glutathione levels were specifically increased after LPS treatment, probably as an attempt to potentiate ROS or xenobiotic scavenging capacity. Interestingly, in LPS+INU glutathione remained at the control level. Supporting our findings, previous studies demonstrated a crucial role for glutathione in gastro-intestinal physiology and protection against pro-inflammatory conditions [50, 51]. Indeed, the impairment of glutathione detoxification activity toward ROS, such as the decreased activity of glutathione peroxidases 1 and 2 in KO mice, led to severe colitis and colonic mucosa destruction [52,53].

In conclusion, our study demonstrates that inulin is able to modulate responses to pathogenic bacterial insults and to protect the colon from inflammatory processes probably by stimulating defense against ROS through the upregulation of colonic mucosal detoxification enzymes and proteins involved in the prevention of the radical-mediated oxidative stress. These data support the clinical beneficial effect of this fructan and highlight putative pathways involved in its protective function. Further investigations are needed to confirm these interesting data, obtained using an experimental model; as most of the ingested fructans would be fermented by the intestinal bacteria, clinical studies should be performed to support the existing literature from human cell cultures and animal studies regarding the anti-inflammatory properties of inulin.

## Supporting Information

**S1 Table. Primer sequences.** For primer design and thermodynamic analysis of their quality the following programs were used: the Primer-Blast tool at NCBI (<http://www.ncbi.nlm.nih.gov/tools/primer-blast/>), OligoCalc (<http://biotools.nubic.northwestern.edu/OligoCalc.html>) and the IDT SciTools (<http://eu.idtdna.com/pages/scitools>).  
(DOC)

## Author Contributions

**Conceptualization:** AA LDG MG MB.

**Data curation:** AA SC VP CF GA CV.

**Formal analysis:** RA AA SB SC VP CF GA SG CV PC.

**Funding acquisition:** LDG MC.

**Investigation:** AA SB SC VP CF GA CV.

**Methodology:** MG AA SC VP CF GA CV.

**Project administration:** MG AA VL.

**Resources:** AA SC VP CF GA CV.

**Supervision:** LDG MB MC.

**Validation:** AA SC VP CF GA CV.

**Visualization:** AA SC.

**Writing – original draft:** MG AA CV VL.

**Writing – review & editing:** LDG MB MC PC.

## References

1. Roberfroid M, Gibson GR, Hoyles L, McCartney AL, Rastall R, Rowland I, et al. Prebiotic effects: metabolic and health benefits. *Br J Nutr*. 2010; 104 Suppl 2: S1–63.
2. Pasqualetti V, Altomare A, Guarino MPL, Locato V, Cocca S, Cimini S, et al. Antioxidant activity of inulin and its role in the prevention of human colonic muscle cell impairment induced by lipopolysaccharide mucosal exposure. *PloS One*. 2014; 9: e98031. doi: [10.1371/journal.pone.0098031](https://doi.org/10.1371/journal.pone.0098031) PMID: [24837182](https://pubmed.ncbi.nlm.nih.gov/24837182/)
3. Whelan K. Mechanisms and effectiveness of prebiotics in modifying the gastrointestinal microbiota for the management of digestive disorders. *Proc Nutr Soc*. 2013; 72: 288–298. doi: [10.1017/S0029665113001262](https://doi.org/10.1017/S0029665113001262) PMID: [23680358](https://pubmed.ncbi.nlm.nih.gov/23680358/)
4. Vulevic J, Juric A, Tzortzis G, Gibson GR. A mixture of trans-galactooligosaccharides reduces markers of metabolic syndrome and modulates the fecal microbiota and immune function of overweight adults. *J Nutr*. 2013; 143: 324–331. doi: [10.3945/jn.112.166132](https://doi.org/10.3945/jn.112.166132) PMID: [23303873](https://pubmed.ncbi.nlm.nih.gov/23303873/)
5. Zenhom M, Hyder A, de Vrese M, Heller KJ, Roeder T, Schrezenmeir J. Prebiotic oligosaccharides reduce proinflammatory cytokines in intestinal Caco-2 cells via activation of PPAR $\gamma$  and peptidoglycan recognition protein 3. *J Nutr*. 2011; 141: 971–977. doi: [10.3945/jn.110.136176](https://doi.org/10.3945/jn.110.136176) PMID: [21451128](https://pubmed.ncbi.nlm.nih.gov/21451128/)
6. Lomax AR, Calder PC. Prebiotics, immune function, infection and inflammation: a review of the evidence. *Br J Nutr*. 2009; 101: 633–658. doi: [10.1017/S0007114508055608](https://doi.org/10.1017/S0007114508055608) PMID: [18814803](https://pubmed.ncbi.nlm.nih.gov/18814803/)
7. Donovan SM, Wang M, Li M, Friedberg I, Schwartz SL, Chapkin RS. Host-microbe interactions in the neonatal intestine: role of human milk oligosaccharides. *Adv Nutr Bethesda Md*. 2012; 3: 450S–5S.
8. Bassaganya-Riera J, DiGuardo M, Viladomiu M, de Horna A, Sanchez S, Einerhand AWC, et al. Soluble fibers and resistant starch ameliorate disease activity in interleukin-10-deficient mice with inflammatory bowel disease. *J Nutr*. 2011; 141: 1318–1325. doi: [10.3945/jn.111.139022](https://doi.org/10.3945/jn.111.139022) PMID: [21562241](https://pubmed.ncbi.nlm.nih.gov/21562241/)
9. Foye OT, Huang I-F, Chiou CC, Walker WA, Shi HN. Early administration of probiotic *Lactobacillus acidophilus* and/or prebiotic inulin attenuates pathogen-mediated intestinal inflammation and Smad 7 cell signaling. *FEMS Immunol Med Microbiol*. 2012; 65: 467–480. doi: [10.1111/j.1574-695X.2012.00978.x](https://doi.org/10.1111/j.1574-695X.2012.00978.x) PMID: [22524476](https://pubmed.ncbi.nlm.nih.gov/22524476/)
10. Štofilová J, Szabadosová V, Hřčková G, Salaj R, Bertková I, Hijová E, et al. Co-administration of a probiotic strain *Lactobacillus plantarum* LS/07 CCM7766 with prebiotic inulin alleviates the intestinal inflammation in rats exposed to N,N-dimethylhydrazine. *Int Immunopharmacol*. 2015; 24: 361–368. doi: [10.1016/j.intimp.2014.12.022](https://doi.org/10.1016/j.intimp.2014.12.022) PMID: [25536541](https://pubmed.ncbi.nlm.nih.gov/25536541/)
11. Cullen JJ, Mercer D, Hinkhouse M, Ephgrave KS, Conklin JL. Effects of endotoxin on regulation of intestinal smooth muscle nitric oxide synthase and intestinal transit. *Surgery*. 1999; 125: 339–344. PMID: [10076620](https://pubmed.ncbi.nlm.nih.gov/10076620/)
12. Scirocco A, Matarrese P, Petitta C, Cicienia A, Ascione B, Mannironi C, et al. Exposure of Toll-like receptors 4 to bacterial lipopolysaccharide (LPS) impairs human colonic smooth muscle cell function. *J Cell Physiol*. 2010; 223: 442–450. doi: [10.1002/jcp.22053](https://doi.org/10.1002/jcp.22053) PMID: [20112289](https://pubmed.ncbi.nlm.nih.gov/20112289/)
13. Guarino MPL, Sessa R, Altomare A, Cocca S, Di Pietro M, Carotti S, et al. Human colonic myogenic dysfunction induced by mucosal lipopolysaccharide translocation and oxidative stress. *Dig Liver Dis*. 2013; 45: 1011–1016. doi: [10.1016/j.dld.2013.06.001](https://doi.org/10.1016/j.dld.2013.06.001) PMID: [23891549](https://pubmed.ncbi.nlm.nih.gov/23891549/)
14. Tattoli I, Petitta C, Scirocco A, Ammoscato F, Cicienia A, Severi C. Microbiota, innate immune system, and gastrointestinal muscle: ongoing studies. *J Clin Gastroenterol*. 2012; 46 Suppl: S6–11.
15. Rebolgar E, Arruebo MP, Plaza MA, Murillo MD. Effect of lipopolysaccharide on rabbit small intestine muscle contractility in vitro: role of prostaglandins. *Neurogastroenterol Motil Off J Eur Gastrointest Motil Soc*. 2002; 14: 633–642.
16. Geiger T, Wehner A, Schaab C, Cox J, Mann M. Comparative proteomic analysis of eleven common cell lines reveals ubiquitous but varying expression of most proteins. *Mol Cell Proteomics MCP*. 2012; 11: M111.014050.
17. Menegazzo L, Albiero M, Millioni R, Tolin S, Arrigoni G, Poncina N, et al. Circulating myeloid calcifying cells have antiangiogenic activity via thrombospondin-1 overexpression. *FASEB J Off Publ Fed Am Soc Exp Biol*. 2013; 27: 4355–4365.

18. Tolin S, Arrigoni G, Trentin AR, Veljovic-Jovanovic S, Pivato M, Zechman B, et al. Biochemical and quantitative proteomics investigations in Arabidopsis ggt1 mutant leaves reveal a role for the gamma-glutamyl cycle in plant's adaptation to environment. *Proteomics*. 2013; 13: 2031–2045. doi: [10.1002/pmic.201200479](https://doi.org/10.1002/pmic.201200479) PMID: [23661340](https://pubmed.ncbi.nlm.nih.gov/23661340/)
19. de Pinto MC, Francis D, De Gara L. The redox state of the ascorbate-dehydroascorbate pair as a specific sensor of cell division in tobacco BY-2 cells. *Protoplasma*. 1999; 209: 90–97. doi: [10.1007/BF01415704](https://doi.org/10.1007/BF01415704) PMID: [18987797](https://pubmed.ncbi.nlm.nih.gov/18987797/)
20. Altomare A, Gizzi A, Guarino MPL, Loppini A, Cocca S, Dipaola M, et al. Experimental evidence and mathematical modeling of thermal effects on human colonic smooth muscle contractility. *Am J Physiol Gastrointest Liver Physiol*. 2014; 307: G77–88. doi: [10.1152/ajpgi.00385.2013](https://doi.org/10.1152/ajpgi.00385.2013) PMID: [24833706](https://pubmed.ncbi.nlm.nih.gov/24833706/)
21. Videla S, Vilaseca J, Antolín M, García-Lafuente A, Guarner F, Crespo E, et al. Dietary inulin improves distal colitis induced by dextran sodium sulfate in the rat. *Am J Gastroenterol*. 2001; 96: 1486–1493. doi: [10.1111/j.1572-0241.2001.03802.x](https://doi.org/10.1111/j.1572-0241.2001.03802.x) PMID: [11374687](https://pubmed.ncbi.nlm.nih.gov/11374687/)
22. Leenen CHM, Dieleman LA. Inulin and oligofructose in chronic inflammatory bowel disease. *J Nutr*. 2007; 137: 2572S–2575S. PMID: [17951505](https://pubmed.ncbi.nlm.nih.gov/17951505/)
23. Macfarlane S, Macfarlane GT, Cummings JH. Review article: prebiotics in the gastrointestinal tract. *Aliment Pharmacol Ther*. 2006; 24: 701–14. doi: [10.1111/j.1365-2036.2006.03042.x](https://doi.org/10.1111/j.1365-2036.2006.03042.x) PMID: [16918875](https://pubmed.ncbi.nlm.nih.gov/16918875/)
24. Holscher HD, Bauer LL, Gourineni V, Pelkman CL, Fahey GC, Swanson KS. Agave Inulin Supplementation Affects the Fecal Microbiota of Healthy Adults Participating in a Randomized, Double-Blind, Placebo-Controlled, Crossover Trial. *J Nutr*. 2015; 145: 2025–32. doi: [10.1093/ajph/145.10.2025](https://doi.org/10.1093/ajph/145.10.2025)
25. Martinez RCR, Bedani R and Saad SMI. Scientific evidence for health effects attributed to the consumption of probiotics and prebiotics: an update for current perspectives and future challenge. *British Journal of Nutrition* 2015; 114: 1993–2015. doi: [10.1017/S0007114515003864](https://doi.org/10.1017/S0007114515003864) PMID: [26443321](https://pubmed.ncbi.nlm.nih.gov/26443321/)
26. Guslandi M. Efficacy of a symbiotic product during clinical relapse of ulcerative colitis. *J Clin Gastroenterol*. 2011; 45(5): 475–476. doi: [10.1097/MCG.0b013e318207f584](https://doi.org/10.1097/MCG.0b013e318207f584) PMID: [21336142](https://pubmed.ncbi.nlm.nih.gov/21336142/)
27. Welters CF, Heineman E, Thunnissen FB, van den Bogaard AE, Soeters PB, Baeten CG. Effect of dietary inulin supplementation on inflammation of pouch mucosa in patients with an ileal pouch-anal anastomosis. *Dis Colon Rectum*. 2002; 45(5): 621–627. doi: [10.1007/s00381-002-0421-1](https://doi.org/10.1007/s00381-002-0421-1) PMID: [12004211](https://pubmed.ncbi.nlm.nih.gov/12004211/)
28. Fernandes R, et al., Effects of inulin-type fructans, galacto-oligosaccharides and related synbiotics on inflammatory markers in adult patients with overweight or obesity: A systematic review, *Clinical Nutrition* (2016),
29. Jedinak A, Dudhgaonkar S, Kelley MR, Sliva D. Apurinic/Apyrimidinic endonuclease 1 regulates inflammatory response in macrophages. *Anticancer Res*. 2011; 31: 379–385. PMID: [21378315](https://pubmed.ncbi.nlm.nih.gov/21378315/)
30. Hofseth LJ, Khan MA, Ambrose M, Nikolayeva O, Xu-Welliver M, Kartalou M, et al. The adaptive imbalance in base excision-repair enzymes generates microsatellite instability in chronic inflammation. *J Clin Invest*. 2003; 112: 1887–1894. doi: [10.1172/JCI119757](https://doi.org/10.1172/JCI119757) PMID: [14679184](https://pubmed.ncbi.nlm.nih.gov/14679184/)
31. Yam AY, Xia Y, Lin H-TJ, Burlingame A, Gerstein M, Frydman J. Defining the TRiC/CCT interactome links chaperonin function to stabilization of newly made proteins with complex topologies. *Nat Struct Mol Biol*. 2008; 15: 1255–1262. doi: [10.1038/nsmb.1515](https://doi.org/10.1038/nsmb.1515) PMID: [19011634](https://pubmed.ncbi.nlm.nih.gov/19011634/)
32. Radulovic M, Baqader NO, Stoeber K, Godovac-Zimmermann J. Spatial Cross-Talk between Oxidative Stress and DNA Replication in Human Fibroblasts. *J Proteome Res*. 2016; 15: 1907–1938. doi: [10.1021/acs.jproteome.6b00101](https://doi.org/10.1021/acs.jproteome.6b00101) PMID: [27142241](https://pubmed.ncbi.nlm.nih.gov/27142241/)
33. Arnould T, Michel S, Renard P. Mitochondria Retrograde Signaling and the UPR mt: Where Are We in Mammals? *Int J Mol Sci*. 2015; 16: 18224–18251. doi: [10.3390/ijms160818224](https://doi.org/10.3390/ijms160818224) PMID: [26258774](https://pubmed.ncbi.nlm.nih.gov/26258774/)
34. Sato M, Kondoh M. Recent studies on metallothionein: protection against toxicity of heavy metals and oxygen free radicals. *Tohoku J Exp Med*. 2002; 196: 9–22. PMID: [12498322](https://pubmed.ncbi.nlm.nih.gov/12498322/)
35. Inoue K-I, Takano H, Yanagisawa R, Sakurai M, Ichinose T, Sadakane K, et al. Role of metallothionein in antigen-related airway inflammation. *Exp Biol Med* Maywood NJ. 2005; 230: 75–81.
36. Pan Y, Huang J, Xing R, Yin X, Cui J, Li W, et al. Metallothionein 2A inhibits NF-κB pathway activation and predicts clinical outcome segregated with TNM stage in gastric cancer patients following radical resection. *J Transl Med*. 2013; 11: 173. doi: [10.1186/1479-5876-11-173](https://doi.org/10.1186/1479-5876-11-173) PMID: [23870553](https://pubmed.ncbi.nlm.nih.gov/23870553/)
37. Mulder TP, van der Sluys Veer A, Verspaget HW, Griffioen G, Peña AS, Janssens AR, et al. Effect of oral zinc supplementation on metallothionein and superoxide dismutase concentrations in patients with inflammatory bowel disease. *J Gastroenterol Hepatol*. 1994; 9: 472–477. PMID: [7827298](https://pubmed.ncbi.nlm.nih.gov/7827298/)
38. Kim HS, Choi EH, Khan J, Roilides E, Francesconi A, Kasai M, et al. Expression of genes encoding innate host defense molecules in normal human monocytes in response to *Candida albicans*. *Infect Immun*. 2005; 73: 3714–3724. doi: [10.1128/IAI.73.6.3714-3724.2005](https://doi.org/10.1128/IAI.73.6.3714-3724.2005) PMID: [15908401](https://pubmed.ncbi.nlm.nih.gov/15908401/)

39. Malfatti MA, Felton JS. N-glucuronidation of 2-amino-1-methyl-6-phenylimidazo[4,5-b]pyridine (PhIP) and N-hydroxy-PhIP by specific human UDP-glucuronosyltransferases. *Carcinogenesis*. 2001; 22: 1087–1093. PMID: [11408353](#)
40. Zheng Z, Fang J-L, Lazarus P. Glucuronidation: an important mechanism for detoxification of benzo[a]pyrene metabolites in aerodigestive tract tissues. *Drug Metab Dispos Biol Fate Chem*. 2002; 30: 397–403. PMID: [11901093](#)
41. Goerres M, Roelofs HMJ, Jansen JBMJ, Peters WHM. Deficient UDP-glucuronosyltransferase detoxification enzyme activity in the small intestinal mucosa of patients with coeliac disease. *Aliment Pharmacol Ther*. 2006; 23: 243–246. doi: [10.1111/j.1365-2036.2006.02754.x](#) PMID: [16393303](#)
42. Bellemare J, Rouleau M, Harvey M, Têtu B, Guillemette C. Alternative-splicing forms of the major phase II conjugating UGT1A gene negatively regulate glucuronidation in human carcinoma cell lines. *Pharmacogenomics J*. 2010; 10: 431–441. doi: [10.1038/tpj.2009.64](#) PMID: [19997083](#)
43. Strassburg CP, Manns MP, Tukey RH. Differential down-regulation of the UDP-glucuronosyltransferase 1A locus is an early event in human liver and biliary cancer. *Cancer Res*. 1997; 57: 2979–2985. PMID: [9230212](#)
44. Wiener D, Fang J-L, Dossett N, Lazarus P. Correlation between UDP-glucuronosyltransferase genotypes and 4-(methylnitrosamino)-1-(3-pyridyl)-1-butanone glucuronidation phenotype in human liver microsomes. *Cancer Res*. 2004; 64: 1190–1196. PMID: [14871856](#)
45. Chen M, Zhang W, Lu X, Hoggatt AM, Gunst SJ, Kassab GS, et al. Regulation of 130-kDa smooth muscle myosin light chain kinase expression by an intronic CArG element. *J Biol Chem*. 2013; 288: 34647–34657. doi: [10.1074/jbc.M113.510362](#) PMID: [24151072](#)
46. He W-Q, Peng Y-J, Zhang W-C, Lv N, Tang J, Chen C, et al. Myosin light chain kinase is central to smooth muscle contraction and required for gastrointestinal motility in mice. *Gastroenterology*. 2008; 135: 610–620. doi: [10.1053/j.gastro.2008.05.032](#) PMID: [18586037](#)
47. Warren SA, Briggs LE, Zeng H, Chuang J, Chang EI, Terada R, et al. Myosin light chain phosphorylation is critical for adaptation to cardiac stress. *Circulation*. 2012; 126: 2575–2588. doi: [10.1161/CIRCULATIONAHA.112.116202](#) PMID: [23095280](#)
48. Adeoye OO, Sorensen DW, Williams J, Pearce W. Hypoxic Regulation of Vascular Proteasomal Degradation of MLCK. *FASEB J*. 2016; 30:1209.9
49. Adyshev DM, Moldobaeva N, Mapes B, Elangovan V, Garcia JGN. MicroRNA regulation of nonmuscle myosin light chain kinase expression in human lung endothelium. *Am J Respir Cell Mol Biol*. 2013; 49: 58–66. doi: [10.1165/rcmb.2012-0397OC](#) PMID: [23492194](#)
50. Zhu H, Li YR. Oxidative stress and redox signaling mechanisms of inflammatory bowel disease: updated experimental and clinical evidence. *Exp Biol Med* Maywood NJ. 2012; 237: 474–480.
51. Hur SJ, Kang SH, Jung HS, Kim SC, Jeon HS, Kim IH, et al. Review of natural products actions on cytokines in inflammatory bowel disease. *Nutr Res N Y N*. 2012; 32: 801–816.
52. Mårtensson J, Jain A, Meister A. Glutathione is required for intestinal function. *Proc Natl Acad Sci U S A*. 1990; 87: 1715–1719. PMID: [2308931](#)
53. Esworthy RS, Aranda R, Martín MG, Doroshow JH, Binder SW, Chu FF. Mice with combined disruption of Gpx1 and Gpx2 genes have colitis. *Am J Physiol Gastrointest Liver Physiol*. 2001; 281: G848–855. PMID: [11518697](#)
